# Supplementary material
Source: PubMed Central journal article supplement (PMC6844230)
Supplement: MD-010-C9MD00234K-s001.pdf [file MD-010-C9MD00234K-s001.pdf]

## **Piperidine Carbamate Peptidomimetic Inhibitors of the Serine Proteases HGFA, Matriptase and Hepsin**

Vishnu C. Damalanka<sup>1</sup>, Scott A. Wildman<sup>2</sup>, James W. Janetka<sup>1,\*</sup>

<sup>1</sup>Department of Biochemistry and Molecular Biophysics, Washington University School of Medicine, St. Louis, Missouri USA

<sup>2</sup>University of Wisconsin Carbone Cancer Center, Drug Development Core, University of Wisconsin-Madison, Madison, Wisconsin USA

### **\*Corresponding Author**

Email: [janetkaj@wustl.edu](mailto:janetkaj@wustl.edu); Phone: 314-362-0509

### **Supplementary material**

#### **Fluorescent Inhibitor Assays of HGFA, matriptase, and hepsin:**

Inhibitors (0-20  $\mu$ M final concentration in reaction) were diluted in DMSO (2% DMSO final concentration in reaction) and then mixed with either recombinant HGFA serine protease domain, Matriptase (#3946-SE-010, R&D Systems, Minneapolis, Minnesota), or activated Hepsin (#4776-SE-010, R&D Systems, Minneapolis, Minnesota) in black 384 well plates (Corning # 3575, Corning, NY). The final assay concentration for HGFA, Matriptase, and Hepsin were 6.25 nM, 0.2 nM, and 0.3 nM, respectively in TNC buffer (25 mM Tris, 150 mM NaCl, 5 mM CaCl<sub>2</sub>, 0.01% Triton X-100, pH 8). After thirty minutes incubation at room temperature, Boc-QLR-AMC substrate was added to the HGFA assays and Boc-QAR-AMC substrate was added to the Matriptase and Hepsin assays. Changes in fluorescence (excitation at 380 nm and emission at 460 nm) were measured at room temperature over time in a Biotek Synergy 2 plate reader (Winoski,

VT). From a plot of the mean reaction velocity versus the inhibitor concentration, a non-linear four parameter curve fit was performed using GraphPad Prism version 6.04 for Windows (GraphPad Software, San Diego, CA, [www.graphpad.com](http://www.graphpad.com)) to determine inhibitor IC<sub>50</sub>s. The IC<sub>50</sub> values that were determined from the average of three separate experimental determinations.

**Hepsin Activation:** Based upon the manufacturer's recommendations, recombinant Hepsin (#4776-SE-010, R&D Systems, Minneapolis, Minnesota) was diluted 5.5 fold in TNC buffer (25 mM Tris, 150 mM NaCl, 5 mM CaCl<sub>2</sub>, 0.01% Triton X-100, pH 8) and incubated at 37°C. After twenty-four hours, the Hepsin was diluted in glycerol to 50%. This stock Hepsin (1.2 μM) was stored in a -20°C freezer and diluted in TNC buffer for use in assays.

**Chromogenic Kinetic Enzyme Assay of Thrombin and Factor Xa:** Inhibitors (0-20 μM final concentration) were serially diluted in DMSO (2% DMSO final concentration) and then mixed with recombinant thrombin (0.15 nM final concentration) or Factor Xa (0.35 nM final concentration) in TNC buffer (25 mM Tris, 150 mM NaCl, 5 mM CaCl<sub>2</sub>, 0.01% Triton X-100, pH 8) using clear 384 well plates. After incubating for 30 minutes at 25° C, the chromogenic substrate (S2238; D-Phe-Pip-Arg-pNA) for thrombin (K<sub>m</sub> = 14.5 μM) or (S2222; Bz-Ile-Glu-Gly-Arg-pNA) for Factor Xa (K<sub>m</sub> = 200 μM) was added to a final concentration of K<sub>m</sub> (4 x K<sub>m</sub> (50 μM) for thrombin) in a final reaction volume of 40 microliters. Changes in absorbance at 405 nm were measured over time in a Biotek Synergy 2 plate (Winnoski, VT). Using GraphPad Prism version 6.04 software program, (GraphPad Software, San Diego, CA, [www.graphpad.com](http://www.graphpad.com)), a four parameter curve fit was used to determine the inhibitor IC<sub>50</sub>s from a plot of the mean reaction

velocity versus the inhibitor concentration. The  $IC_{50}$  values represent the average of three separate experimental determinations.

## Spectral data

### *t*-Butyl 4-hydroxy-4-phenylpiperidine-1-carboxylate (3a).

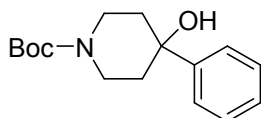

Sticky oil, yield (0.47 g),  $^1H$  NMR (400MHz,  $CDCl_3$ )  $\delta$  = 7.49 (d,  $J$  = 7.8 Hz, 2 H), 7.38 (t,  $J$  = 7.6 Hz, 2 H), 7.30 (d,  $J$  = 7.4 Hz, 1 H), 4.04 (d,  $J$  = 12.9 Hz, 2 H), 3.25 (t,  $J$  = 12.5 Hz, 2 H), 2.01 (dt,  $J$  = 4.5, 13.2 Hz, 2 H), 1.74 (d,  $J$  = 13.7 Hz, 2 H), 1.62 (s, 1 H), 1.49 (s, 9 H). LCMS (ESI+) expected  $m/z$  277.17, found 278.30 ( $M+H^+$ ).

### *t*-Butyl 4-benzyl-4-hydroxypiperidine-1-carboxylate (3b).

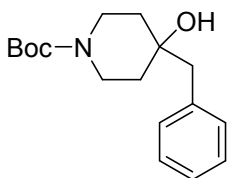

Oil, yield (0.43 g),  $^1H$  NMR (400MHz,  $CDCl_3$ )  $\delta$  = 7.38-7.20 (m, 4 H), 7.10 (t,  $J$  = 7.5 Hz, 1 H), 3.94 (d,  $J$  = 12.9 Hz, 2 H), 3.15 (t,  $J$  = 12.5 Hz, 2 H), 2.65 (s, 2 H), 1.64-1.50 (m, 4 H), 1.51 (s, 9 H). LCMS (ESI+) expected  $m/z$  291.18, found 292.30 ( $M+H^+$ ).

### *t*-Butyl 4-hydroxy-4-phenethylpiperidine-1-carboxylate (3c).

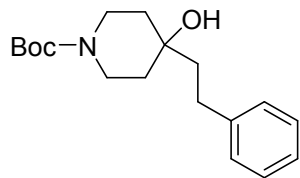

Oil, yield (0.24 g),  $^1\text{H NMR}$  (400MHz,  $\text{CDCl}_3$ )  $\delta = 7.32 - 7.27$  (m, 2 H), 7.20 (d,  $J = 7.0$  Hz, 3 H), 3.83 (d,  $J = 10.2$  Hz, 3 H), 3.26 - 3.13 (m, 3 H), 2.76 - 2.68 (m, 3 H), 1.85 - 1.76 (m, 3 H), 1.61 (d,  $J = 4.3$  Hz, 5 H), 1.47 (s, 9 H). LCMS (ESI+) expected  $m/z$  305.20, found 306.40 ( $\text{M}+\text{H}^+$ ).

**t-Butyl 4-(hydroxy(phenyl)methyl)piperidine-1-carboxylate (3d).**

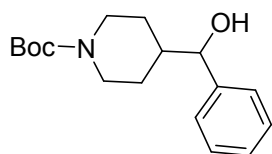

Oil, yield (0.56 g),  $^1\text{H NMR}$  (400MHz,  $\text{CDCl}_3$ )  $\delta = .49$  (d,  $J = 7.8$  Hz, 2 H), 7.38 (t,  $J = 7.6$  Hz, 2 H), 7.30 (d,  $J = 7.4$  Hz, 1 H), 4.04 (d,  $J = 12.9$  Hz, 2 H), 3.25 (t,  $J = 12.5$  Hz, 2 H), 2.01 (dt,  $J = 4.5, 13.2$  Hz, 2 H), 1.74 (d,  $J = 13.7$  Hz, 2 H), 1.62 (s, 1 H), 1.58 - 1.47 (m, 2 H), 1.45 (s, 9 H). LCMS (ESI+) expected  $m/z$  291.18, found 292.30 ( $\text{M}+\text{H}^+$ ).

**t-Butyl 4-(1-hydroxy-2-phenylethyl)piperidine-1-carboxylate (3e).**

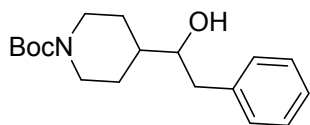

Oil, yield (0.50 g),  $^1\text{H NMR}$  (400MHz,  $\text{CDCl}_3$ )  $\delta = 7.29$  (d,  $J = 0.8$  Hz, 1 H), 7.25 (s, 1 H), 7.21 (s, 1 H), 7.20 - 7.14 (m, 2 H), 4.53 (d,  $J = 5.5$  Hz, 1 H), 4.10 - 4.03 (m, 1 H), 3.55 (br. s., 1 H), 2.84 (dd,  $J = 3.1, 13.7$  Hz, 1 H), 2.69 - 2.50 (m, 2 H), 1.99 (s, 2 H), 1.82 (d,  $J = 12.9$  Hz, 1 H), 1.72 -

1.60 (m, 2 H), 1.58 - 1.47 (m, 2 H), 1.40 (d,  $J = 3.5$  Hz, 9 H). LCMS (ESI+) expected  $m/z$  305.20, found 306.40 ( $M+H^+$ ).

***t*-Butyl 4-((((*S*)-1-methoxy-4-methyl-1-oxopentan-2-yl)carbamoyl)oxy)(phenyl)methyl)piperidine-1-carboxylate (9a).**

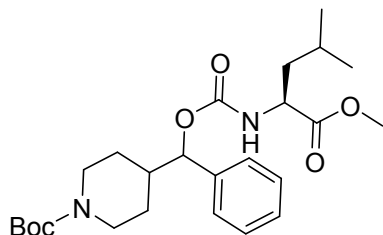

Oil, yield (124 mg),  $^1H$  NMR (400MHz,  $CDCl_3$ )  $\delta = 7.38 - 7.29$  (m, 5 H), 4.80 (br. s., 1 H), 4.47 (br. s., 1 H), 4.39 (d,  $J = 7.4$  Hz, 1 H), 4.17 - 4.10 (m, 1 H), 3.74 (s, 3 H), 2.71 - 2.54 (m, 2 H), 2.05 (s, 1 H), 1.66 - 1.55 (m, 5 H), 1.46 (br. s., 1 H), 1.45 (s, 9 H), 1.31 - 1.25 (m, 2 H), 1.21 - 1.12 (m, 1 H), 0.95 (td,  $J = 3.1, 6.3$  Hz, 6 H). LCMS (ESI+) expected  $m/z$  462.27, found 463.40 ( $M+H^+$ ).

***t*-Butyl 4-(1-((((*S*)-1-methoxy-4-methyl-1-oxopentan-2-yl)carbamoyl)oxy)-2-phenylethyl)piperidine-1-carboxylate (9b).**

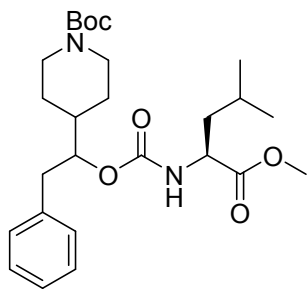

Oil, yield (152 mg),  $^1H$  NMR (400MHz,  $CDCl_3$ )  $\delta = 7.29 - 7.26$  (m, 1 H), 7.22 - 7.18 (m, 1 H), 7.16 (d,  $J = 7.8$  Hz, 2 H), 4.94 - 4.86 (m, 1 H), 4.53 (d,  $J = 5.1$  Hz, 1 H), 4.06 (q,  $J = 7.2$  Hz, 2 H), 5.13 - 3.83 (m, 2 H), 3.66 (d,  $J = 3.1$  Hz, 1 H), 3.59 - 3.52 (m, 1 H), 3.26 - 3.19 (m, 1 H), 2.84 (dd,  $J = 3.3, 13.5$  Hz, 1 H), 2.62 (d,  $J = 9.4$  Hz, 2 H), 1.99 (s, 1 H), 1.82 (d,  $J = 13.3$  Hz, 1 H), 1.70 -

1.62 (m, 3 H), 1.53 - 1.50 (m, 1 H), 1.41 (s, 9 H), 1.20 (t,  $J = 7.2$  Hz, 2 H), 0.89 - 0.87 (m, 6 H).  
LCMS (ESI+) expected  $m/z$  476.29, found 476.40 ( $M+H^+$ ).

***t*-Butyl (S)-4-(((1-methoxy-4-methyl-1-oxopentan-2-yl)carbamoyl)oxy)-4-phenylpiperidine-1-carboxylate (4a).**

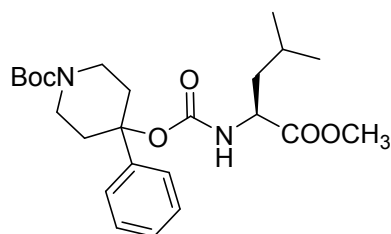

Oil, yield (125 mg),  $^1H$  NMR (400MHz,  $CDCl_3$ )  $\delta = 7.42 - 7.38$  (m, 2 H), 7.32 - 7.28 (m, 1 H), 7.23 - 7.17 (m, 2 H), 4.07 - 3.82 (m, 2 H), 3.64 (s, 3 H), 3.25 - 3.10 (m, 2 H), 1.96 (s, 2 H), 1.70 - 1.61 (m, 3 H), 1.40 (s, 9 H), 1.17 (t,  $J = 7.6$  Hz, 1 H), 0.90 - 0.82 (m, 9 H). LCMS (ESI+) expected  $m/z$  448.26, found 449.40 ( $M+H^+$ ).

***t*-Butyl (S)-4-benzyl-4-(((1-methoxy-4-methyl-1-oxopentan-2-yl)carbamoyl)oxy)piperidine-1-carboxylate (4b).**

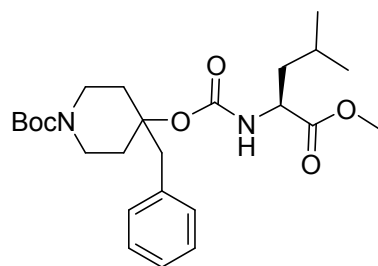

Oil, yield (200 mg),  $^1H$  NMR (400MHz,  $CDCl_3$ )  $\delta = 7.36 - 7.28$  (m, 3 H), 7.20 (d,  $J = 7.4$  Hz, 2 H), 5.03 (dd,  $J = 8.2, 18.4$  Hz, 2 H), 4.48 (dt,  $J = 4.5, 8.9$  Hz, 2 H), 3.73 (s, 3 H), 3.10 (br. s., 1 H), 2.76 (s, 1 H), 1.64 - 1.55 (m, 4 H), 1.53 - 1.49 (m, 2 H), 1.46 (s, 9 H), 0.96 - 0.93 (m, 6 H). LCMS (ESI+) expected  $m/z$  462.27, found 463.40 ( $M+H^+$ ).

***t*-Butyl (S)-4-(((1-methoxy-4-methyl-1-oxopentan-2-yl)carbamoyl)oxy)-4-phenethylpiperidine-1-carboxylate (4c).**

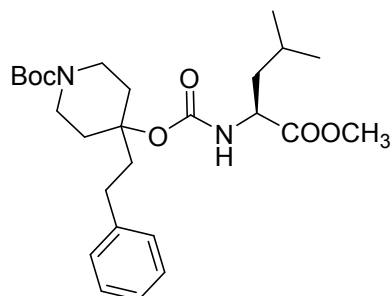

Oil, yield (215 mg),  $^1\text{H NMR}$  (400MHz,  $\text{CDCl}_3$ )  $\delta$  = 7.32 - 7.27 (m, 3 H), 7.20 (d,  $J$  = 6.7 Hz, 2 H), 4.92 - 4.84 (m, 1 H), 4.48 (br. s., 1 H), 3.95 - 3.79 (m, 2 H), 3.73 (s, 1 H), 3.26 - 3.13 (m, 2 H), 2.76 - 2.69 (m, 2 H), 1.84 - 1.77 (m, 2 H), 1.61 (d,  $J$  = 4.3 Hz, 5 H), 1.47 (s, 9 H), 0.94 (dd,  $J$  = 3.3, 6.5 Hz, 6 H). LCMS (ESI+) expected  $m/z$  476.29, found 477.50 ( $\text{M}+\text{H}^+$ ).

**Methyl (((1-acetyl-4-phenethylpiperidin-4-yl)oxy)carbonyl)-L-leucinate (4d).**

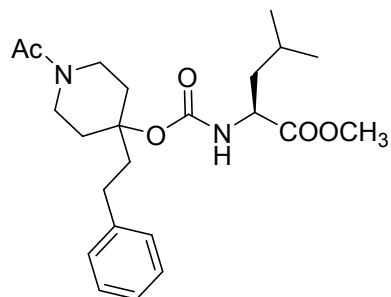

Oil, yield (150 mg),  $^1\text{H NMR}$  (400MHz,  $\text{CDCl}_3$ )  $\delta$  = 7.33 - 7.27 (m, 2 H), 7.20 (d,  $J$  = 7.4 Hz, 3 H), 5.00 - 4.90 (m, 1 H), 4.52 - 4.43 (m, 1 H), 4.36 (d,  $J$  = 12.9 Hz, 1 H), 3.73 (s, 3 H), 3.61 (d,  $J$  = 13.3 Hz, 1 H), 3.53 - 3.43 (m, 1 H), 3.11 - 3.02 (m, 1 H), 2.76 - 2.69 (m, 2 H), 2.11 (s, 3 H), 1.85 - 1.78 (m, 2 H), 1.74 - 1.57 (m, 9 H), 1.53 - 1.46 (m, 2 H), 0.94 (dd,  $J$  = 2.9, 6.5 Hz, 7 H). LCMS (ESI+) expected  $m/z$  418.25, found 419.50 ( $\text{M}+\text{H}^+$ ).

***t*-Butyl (S)-4-(((1-methoxy-4-methyl-1-oxopentan-2-yl)carbamoyl)oxy)piperidine-1-carboxylate (4e).**

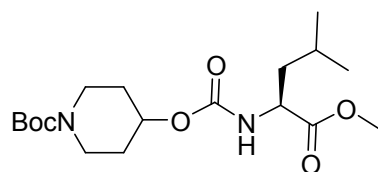

Oil, yield (2.4 g),  $^1\text{H NMR}$  (400MHz,  $\text{CDCl}_3$ )  $\delta$  = 5.06 (d,  $J$  = 8.6 Hz, 1 H), 4.80 (br. s., 2 H), 4.52 - 4.44 (m, 1 H), 4.37 (d,  $J$  = 5.1 Hz, 1 H), 3.74 (s, 3H), 3.24 - 3.14 (m, 2 H), 1.85 (br. s., 3 H), 1.60 (dd,  $J$  = 7.4, 12.5 Hz, 4 H), 1.46 (s, 9 H), 0.97 - 0.92 (m, 8 H). LCMS (ESI+) expected  $m/z$  372.23, found 373.40 ( $\text{M}+\text{H}^+$ ).

**t-Butyl (S)-4-(((3-cyclohexyl-1-methoxy-1-oxopropan-2-yl)carbamoyl)oxy)-4-phenylpiperidine-1-carboxylate (4f).**

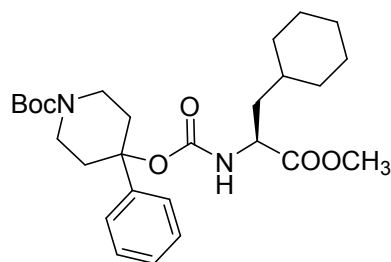

Oil, yield (0.37 g),  $^1\text{H NMR}$  (400MHz,  $\text{CDCl}_3$ )  $\delta$  = 7.48 (d,  $J$  = 7.4 Hz, 2 H), 7.38 (t,  $J$  = 7.6 Hz, 2 H), 7.29 (d,  $J$  = 7.4 Hz, 1 H), 4.83 (d,  $J$  = 8.6 Hz, 1 H), 4.49 (d,  $J$  = 5.5 Hz, 1 H), 4.09 - 3.99 (m, 2 H), 3.73 (s, 3 H), 3.26 (br. s., 2 H), 2.01 (br. s., 2 H), 1.83 - 1.58 (m, 13 H), 1.49 (s, 9 H), 1.41 - 1.30 (m, 2 H), 1.30 - 1.10 (m, 6 H), 0.99 - 0.83 (m, 4 H). LCMS (ESI+) expected  $m/z$  488.29, found 489.40 ( $\text{M}+\text{H}^+$ ).

**Methyl (((1-(ethylsulfonyl)piperidin-4-yl)oxy)carbonyl)-L-leucinate (5a).**

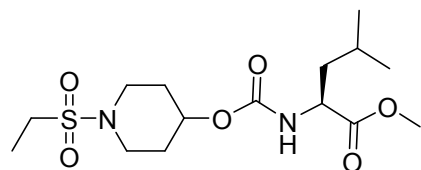



Oil, yield (150 mg),  $^1\text{H NMR}$  (400MHz,  $\text{CDCl}_3$ )  $\delta$  = 5.94 (br. s., 2 H), 5.12 (br. s., 1 H), 4.84 (br. s., 1 H), 4.37 (d,  $J$  = 3.1 Hz, 1 H), 3.75 (s, 1 H), 3.56 - 3.44 (m, 2 H), 3.23 (dd,  $J$  = 3.5, 7.8 Hz, 2 H), 3.01 - 2.93 (m, 2 H), 1.96 (d,  $J$  = 3.1 Hz, 2 H), 1.86 - 1.64 (m, 4 H), 1.64 - 1.49 (m, 2 H), 1.37 (t,  $J$  = 7.2 Hz, 3 H), 0.97 (d,  $J$  = 5.9 Hz, 6 H). LCMS (ESI+) expected  $m/z$  364.17, found 365.30 ( $\text{M}+\text{H}^+$ ).

**Methyl (((1-(phenylsulfonyl)piperidin-4-yl)oxy)carbonyl)-L-leucinate (5b).**

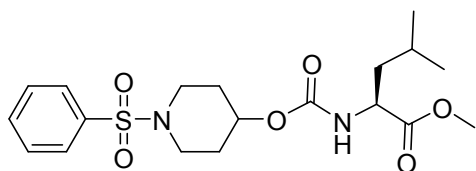

Oil, yield (159 mg),  $^1\text{H NMR}$  (400MHz,  $\text{CDCl}_3$ )  $\delta$  = 7.78 (d,  $J$  = 7.8 Hz, 2 H), 7.66 - 7.60 (m, 1 H), 7.59 - 7.53 (m, 2 H), 5.00 (d,  $J$  = 8.6 Hz, 1 H), 4.92 - 4.85 (m, 1 H), 4.69 (br. s., 1 H), 4.53 - 4.43 (m, 1 H), 4.38 - 4.28 (m, 2 H), 3.72 (s, 3 H), 3.26 (br. s., 2 H), 2.96 (br. s., 2 H), 1.95 (d,  $J$  = 3.9 Hz, 2 H), 1.78 (br. s., 2 H), 1.70 - 1.55 (m, 3 H), 1.53 - 1.43 (m, 2 H), 0.97 - 0.88 (m, 6 H). LCMS (ESI+) expected  $m/z$  412.17, found 413.30 ( $\text{M}+\text{H}^+$ ).

**Methyl (((1-((3-fluorophenyl)sulfonyl)piperidin-4-yl)oxy)carbonyl)-L-leucinate (5c).**

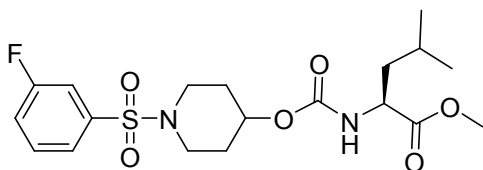

Oil, yield (148 mg),  $^1\text{H NMR}$  (400MHz,  $\text{CDCl}_3$ )  $\delta$  = 7.61 - 7.50 (m, 2 H), 7.48 (d,  $J$  = 7.8 Hz, 1 H), 7.39 - 7.30 (m, 1 H), 5.01 (d,  $J$  = 8.2 Hz, 1 H), 4.91 - 4.80 (m, 1 H), 4.72 (br. s., 1 H), 4.48 (d,  $J$  = 5.1 Hz, 1 H), 4.37 - 4.28 (m, 1 H), 3.73 (s, 3 H), 3.23 (br. s., 2 H), 3.03 (br. s., 2 H), 1.96 (br.

s., 2 H), 1.80 (br. s., 2 H), 1.62 (s, 2 H), 1.54 - 1.44 (m, 2 H), 0.93 (br. s., 6 H). LCMS (ESI+) expected m/z 430.16, found 431.30 (M+H<sup>+</sup>).

**Methyl (((1-((2-fluorophenyl)sulfonyl)piperidin-4-yl)oxy)carbonyl)-L-leucinate (5d).**

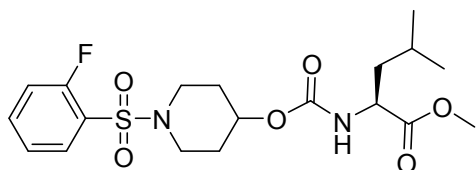

Oil, yield (126 mg), <sup>1</sup>H NMR (400MHz, CDCl<sub>3</sub>) δ = 8.00 (t, *J* = 7.4 Hz, 1 H), 7.86 (t, *J* = 7.4 Hz, 1 H), 7.81 - 7.71 (m, 1 H), 7.63 - 7.56 (m, 1 H), 7.43 - 7.35 (m, 1 H), 5.31 (s, 1 H), 5.03 (d, *J* = 9.4 Hz, 1 H), 4.83 - 4.73 (m, 1 H), 4.53 - 4.42 (m, 1 H), 4.34 (d, *J* = 4.7 Hz, 1 H), 3.73 (s, 3 H), 3.41 (br. s., 2 H), 3.17 (d, *J* = 7.8 Hz, 2 H), 1.95 (br. s., 2 H), 1.79 (br. s., 2 H), 1.71 - 1.57 (m, 6 H), 1.54 - 1.43 (m, 2 H), 0.93 (d, *J* = 4.3 Hz, 6 H). LCMS (ESI+) expected m/z 430.16, found 431.30 (M+H<sup>+</sup>).

**Methyl (((1-((4-chlorophenyl)sulfonyl)piperidin-4-yl)oxy)carbonyl)-L-leucinate (5e).**

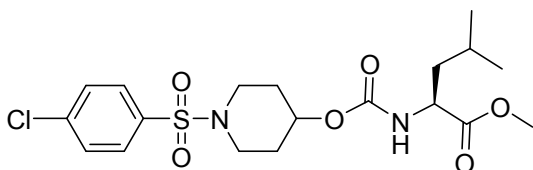

Oil, yield (150 mg), <sup>1</sup>H NMR (400MHz, CDCl<sub>3</sub>) δ = 7.71 (d, *J* = 7.4 Hz, 2 H), 7.53 (d, *J* = 7.8 Hz, 2 H), 5.01 (d, *J* = 8.2 Hz, 1 H), 4.72 (br. s., 1 H), 4.52 - 4.43 (m, 1 H), 4.38 - 4.28 (m, 1 H), 3.73 (s, 3 H), 3.19 (br. s., 2 H), 3.02 (br. s., 2 H), 1.95 (br. s., 2 H), 1.80 (br. s., 2 H), 1.62 (br. s., 4 H), 1.54 - 1.42 (m, 2 H), 0.94 (br. s., 6 H). LCMS (ESI+) expected m/z 446.13, found 447.20 (M+H<sup>+</sup>).

**Methyl (((1-((2,4-dinitrophenyl)sulfonyl)piperidin-4-yl)oxy)carbonyl)-L-leucinate (5f).**

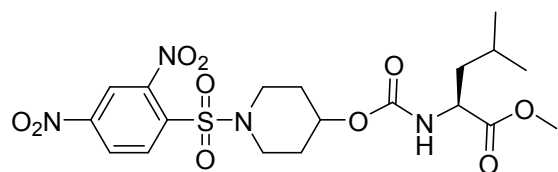

Yellow solid, yield (136 mg),  $^1\text{H NMR}$  (400MHz,  $\text{CDCl}_3$ )  $\delta$  = 8.54 - 8.47 (m, 2 H), 8.23 (d,  $J$  = 8.6 Hz, 1H), 5.08 (d,  $J$  = 8.2 Hz, 1 H), 4.86 (br. s., 1 H), 4.40 - 4.31 (m, 1 H), 3.74 (s, 3 H), 3.56 - 3.31 (m, 4 H), 1.97 (d,  $J$  = 4.3 Hz, 2 H), 1.84 (d,  $J$  = 5.9 Hz, 2 H), 1.74 - 1.56 (m, 2 H), 1.55 - 1.45 (m, 2 H), 1.32 - 1.21 (m, 2 H), 0.94 (t,  $J$  = 4.9 Hz, 6 H). LCMS (ESI+) expected  $m/z$  502.10, found 503.20 ( $\text{M}+\text{H}^+$ ).

**Methyl (((1-((5-chloro-2-methoxyphenyl)sulfonyl)piperidin-4-yl)oxy)carbonyl)-L-leucinate (5g).**

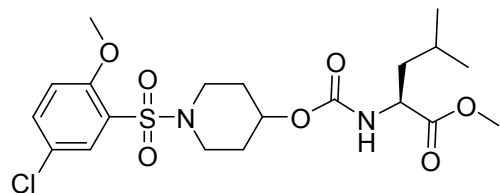

Oil, yield (167 mg),  $^1\text{H NMR}$  (400MHz,  $\text{CDCl}_3$ )  $\delta$  = 7.88 (d,  $J$  = 2.3 Hz, 1 H), 7.51 - 7.44 (m, 1 H), 6.97 (d,  $J$  = 9.0 Hz, 1 H), 5.05 (d,  $J$  = 8.6 Hz, 1 H), 4.77 (br. s., 1 H), 4.40 - 4.31 (m, 1 H), 3.93 (s, 3 H), 3.74 (s, 3 H), 3.48 (d,  $J$  = 5.9 Hz, 2 H), 3.22 - 3.11 (m, 2 H), 1.93 (br. s., 2 H), 1.80 - 1.68 (m, 2 H), 1.62 (s, 2 H), 1.55 - 1.46 (m, 2 H), 0.94 (d,  $J$  = 5.5 Hz, 6 H). LCMS (ESI+) expected  $m/z$  476.14, found 477.30 ( $\text{M}+\text{H}^+$ ).

**Methyl (((1-(mesitylsulfonyl)piperidin-4-yl)oxy)carbonyl)-L-leucinate (5h).**

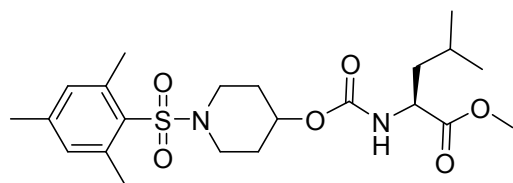

Oil, yield (162 mg),  $^1\text{H NMR}$  (400MHz,  $\text{CDCl}_3$ )  $\delta$  = 6.96 (s, 2 H), 5.05 (d,  $J$  = 8.6 Hz, 1 H), 4.89 - 4.78 (m, 1 H), 4.36 (d,  $J$  = 5.1 Hz, 1 H), 3.74 (s, 3 H), 3.36 (br. s., 2 H), 3.11 (d,  $J$  = 7.8 Hz, 2 H), 2.62 (s, 6 H), 2.31 (s, 3 H), 1.90 (br. s., 3 H), 1.80 - 1.65 (m, 4 H), 1.56 - 1.45 (m, 2 H), 0.95 (d,  $J$  = 5.5Hz, 6 H). LCMS (ESI+) expected  $m/z$  454.21, found 455.40 ( $\text{M}+\text{H}^+$ ).

**(((1-(tert-butoxycarbonyl)piperidin-4-yl)(phenyl)methoxy)carbonyl)-L-leucine (10a).**

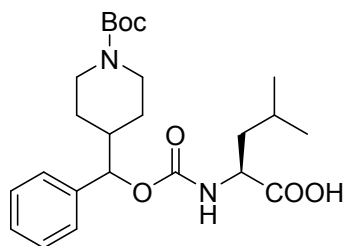

Off white solid, yield (110 mg),  $^1\text{H NMR}$  (400MHz,  $\text{CDCl}_3$ )  $\delta$  = 7.40 - 7.28 (m, 5 H), 5.56 - 5.39 (m, 1 H), 4.43 - 4.28 (m, 1 H), 4.21 - 3.99 (m, 1 H), 2.63 (br. s., 1 H), 1.90 (br. s., 2 H), 1.84 - 1.63 (m, 4 H), 1.45 (s, 9 H), 1.28 (d,  $J$  = 9.4 Hz, 3 H), 1.04 - 0.85 (m, 7 H). LCMS (ESI+) expected  $m/z$  448.26, found 449.40 ( $\text{M}+\text{H}^+$ ).

**((1-(1-(tert-butoxycarbonyl)piperidin-4-yl)-2-phenylethoxy)carbonyl)-L-leucine (10b).**

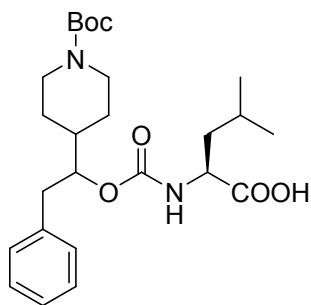

Off white solid, yield (270 mg),  $^1\text{H NMR}$  (400MHz,  $\text{CDCl}_3$ )  $\delta$  = 7.36 - 7.30 (m, 2 H), 7.26 - 7.20 (m, 3 H), 4.62 - 4.58 (m, 1 H), 4.22 - 4.09 (m, 3 H), 3.62 (s, 2 H), 2.91 (dd,  $J$  = 3.3, 13.5 Hz, 2 H), 2.75 - 2.57 (m, 4 H), 1.88 (d,  $J$  = 12.5 Hz, 2 H), 1.72 (t,  $J$  = 12.7 Hz, 2 H), 1.47 (s, 9 H), 1.34 - 1.23 (m, 2 H), 1.02 - 0.92 (m, 6 H). LCMS (ESI+) expected  $m/z$  462.27, found 463.40 ( $\text{M}+\text{H}^+$ ).

**(((1-(tert-butoxycarbonyl)-4-phenylpiperidin-4-yl)oxy)carbonyl)-L-leucine (6a).**

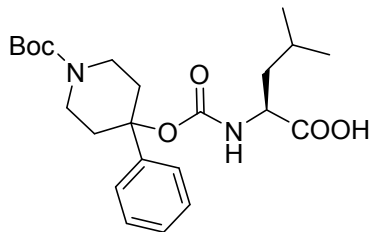

Thick oil, yield (165 mg),  $^1\text{H NMR}$  (400MHz,  $\text{CDCl}_3$ )  $\delta$  = 7.51 - 7.46 (m, 2 H), 7.38 (t,  $J$  = 7.6 Hz, 2 H), 7.30 (d,  $J$  = 7.0 Hz, 1 H), 4.08 - 4.00 (m, 2 H), 3.72 (s, 1 H), 3.26 (dt,  $J$  = 2.3, 12.9 Hz, 3 H), 2.45 (s, 1 H), 2.00 (dd,  $J$  = 4.9, 13.1 Hz, 2 H), 1.75 (d,  $J$  = 12.5 Hz, 2 H), 1.50 (s, 2 H), 1.49 (s, 9 H), 1.01 - 0.93 (m, 6 H). LCMS (ESI+) expected  $m/z$  434.24, found 435.40 ( $\text{M}+\text{H}^+$ ).

**(((4-benzyl-1-(tert-butoxycarbonyl)piperidin-4-yl)oxy)carbonyl)-L-leucine (6b).**

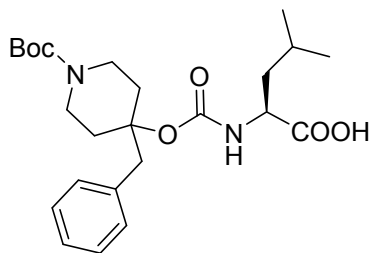

Off white solid, yield (174 mg),  $^1\text{H NMR}$  (400MHz,  $\text{CDCl}_3$ )  $\delta$  = 7.36 - 7.28 (m, 3 H), 7.20 (d,  $J$  = 7.8 Hz, 2 H), 6.43 (br. s., 1 H), 4.76 (dd,  $J$  = 4.3, 11.7 Hz, 1 H), 4.11 (d,  $J$  = 10.2 Hz, 1 H), 3.87 (br. s., 2 H), 3.10 (br. s., 2 H), 2.77 (s, 2 H), 2.26 (d,  $J$  = 11.3 Hz, 1 H), 1.93 - 1.76 (m, 4 H), 1.66 - 1.50 (m, 5 H), 1.46 (s, 9 H), 1.28 (t,  $J$  = 6.5 Hz, 1 H), 0.95 (d,  $J$  = 6.7 Hz, 6 H). LCMS (ESI+) expected  $m/z$  448.26, found 449.40 ( $\text{M}+\text{H}^+$ ).

**(((1-acetyl-4-phenethylpiperidin-4-yl)oxy)carbonyl)-L-leucine (6c)**

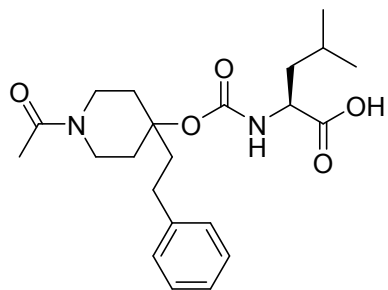

Off white solid, yield (200 mg),  $^1\text{H NMR}$  (400MHz,  $\text{CDCl}_3$ )  $\delta = 7.33 - 7.28$  (m, 2 H), 7.20 (d,  $J = 7.0$  Hz, 3 H), 6.45 (br. s., 1 H), 4.75 (dd,  $J = 2.3, 11.3$  Hz, 1 H), 4.10 (d,  $J = 9.4$  Hz, 1 H), 2.72 (br. s., 2 H), 2.16 (br. s., 3 H), 2.09 (s, 1 H), 1.80 (br. s., 4 H), 1.68 (br. s., 4 H), 0.99 (d,  $J = 8.2$  Hz, 2 H), 0.95 (d,  $J = 6.3$  Hz, 6 H). LCMS (ESI+) expected  $m/z$  404.23, found 405.40 ( $\text{M}+\text{H}^+$ ).

**(((1-acetylpiperidin-4-yl)oxy)carbonyl)-L-leucine (6d).**

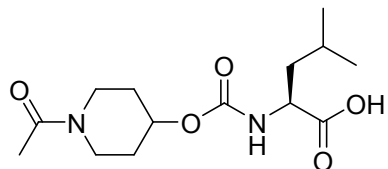

Off white solid, yield (370 mg),  $^1\text{H NMR}$  (400MHz,  $\text{CHLOROFORM-d}$ )  $\delta = 5.20$  (br. s., 1 H), 4.89 (br. s., 1 H), 4.78 - 4.72 (m, 1 H), 4.37 (d,  $J = 3.9$  Hz, 2 H), 4.18 - 4.07 (m, 2 H), 3.72 - 3.53 (m, 3 H), 3.40 (br. s., 2 H), 2.14 (s, 3 H), 1.98 - 1.83 (m, 2 H), 1.83 - 1.62 (m, 2 H), 1.57 (ddd,  $J = 5.3, 8.9, 13.6$  Hz, 2 H), 0.97 (d,  $J = 6.3$  Hz, 6 H). LCMS (ESI+) expected  $m/z$  300.17, found 301.30 ( $\text{M}+\text{H}^+$ ).

**(S)-2-(((1-(tert-butoxycarbonyl)-4-phenylpiperidin-4-yl)oxy)carbonyl)amino)-3-cyclohexylpropanoic acid (6e).**

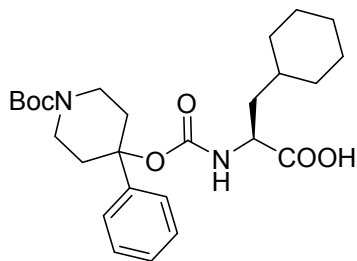

Off white solid, yield (314 mg),  $^1\text{H NMR}$  (400MHz,  $\text{CDCl}_3$ )  $\delta = 7.48$  (d,  $J = 7.4$  Hz, 2 H), 7.38 (t,  $J = 7.6$  Hz, 2 H), 7.29 (d,  $J = 7.4$  Hz, 1 H), 4.83 (d,  $J = 8.6$  Hz, 1 H), 4.49 (d,  $J = 5.5$  Hz, 1 H), 4.09 - 3.99 (m, 2 H), 3.73 (s, 3 H), 3.26 (br. s., 2 H), 2.01 (br. s., 2 H), 1.83 - 1.58 (m, 13 H), 1.49 (s, 9 H), 1.41 - 1.30 (m, 2 H), 1.30 - 1.10 (m, 6 H), 0.99 - 0.83 (m, 4 H). LCMS (ESI+) expected  $m/z$  474.27, found 475.40 ( $\text{M}+\text{H}^+$ ).

**(((1-(ethylsulfonyl)piperidin-4-yl)oxy)carbonyl)-L-leucine (6f).**

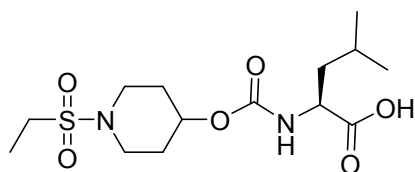

Oil, yield (120 mg),  $^1\text{H NMR}$  (400MHz,  $\text{CDCl}_3$ )  $\delta = 6.40$  (br. s., 1 H), 5.62 (br. s., 1 H), 5.07 (d,  $J = 8.2$  Hz, 1 H), 4.85 (br. s., 1 H), 4.38 (br. s., 2 H), 3.50 (br. s., 2 H), 3.22 (br. s., 3 H), 2.97 (q,  $J = 7.2$  Hz, 2 H), 1.97 (br. s., 3 H), 1.86 - 1.66 (m, 4 H), 1.63 - 1.53 (m, 2 H), 1.37 (t,  $J = 7.2$  Hz, 3 H), 1.02 - 0.93 (m, 6 H). LCMS (ESI+) expected  $m/z$  350.15, found 351.20 ( $\text{M}+\text{H}^+$ ).

**(((1-(phenylsulfonyl)piperidin-4-yl)oxy)carbonyl)-L-leucine (6g).**

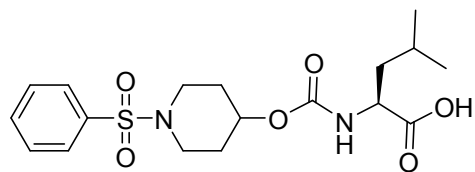

White solid, yield (118 mg),  $^1\text{H NMR}$  (400MHz,  $\text{CDCl}_3$ )  $\delta = 7.78$  (d,  $J = 7.4$  Hz, 2 H), 7.65 - 7.53 (m, 3 H), 5.00 (d,  $J = 8.6$  Hz, 1 H), 4.76 (dd,  $J = 4.1, 11.2$  Hz, 1 H), 4.69 (br. s., 1 H), 4.38 - 4.28 (m, 1 H), 4.02 (br. s., 1 H), 3.30 (br. s., 2 H), 3.17 (br. s., 1 H), 2.92 (br. s., 2 H), 1.95 (d,  $J = 3.9$

Hz, 2 H), 1.85 - 1.72 (m, 2 H), 1.71 - 1.62 (m, 2H), 1.57 - 1.47 (m, 2 H), 0.97 - 0.90 (m, 6 H).

LCMS (ESI+) expected m/z 398.15, found 399.30 (M+H<sup>+</sup>).

**(((1-((4-chlorophenyl)sulfonyl)piperidin-4-yl)oxy)carbonyl)-L-leucine (6h).**

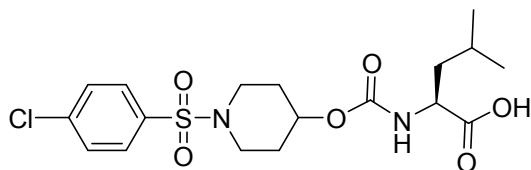

White solid, yield (140 mg), <sup>1</sup>H NMR (400MHz, CDCl<sub>3</sub>) δ = 7.71 (d, *J* = 8.2 Hz, 2 H), 7.53 (d, *J* = 8.2 Hz, 2 H), 6.28 (br. s., 1 H), 4.98 (d, *J* = 8.2 Hz, 1 H), 4.81 -4.68 (m, 1 H), 4.33 (br. s., 1 H), 3.24 (br. s., 2 H), 2.99 (br. s., 2 H), 1.96 (br. s., 2 H), 1.85 - 1.64 (m, 4 H), 1.61 - 1.49 (m, 1 H), 0.95 (d, *J* = 5.5 Hz, 6 H). LCMS (ESI+) expected m/z 432.11, found 432.30 (M+H<sup>+</sup>).

**(((1-((2-fluorophenyl)sulfonyl)piperidin-4-yl)oxy)carbonyl)-L-leucine (6i).**

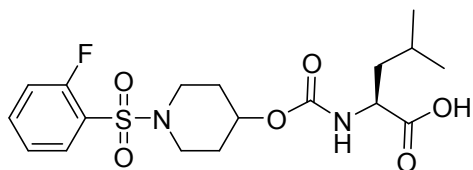

Off white solid, yield (120 mg), <sup>1</sup>H NMR (400MHz, CDCl<sub>3</sub>) δ = 7.86 (t, *J* = 7.2 Hz, 1 H), 7.60 (q, *J* = 6.7 Hz, 1 H), 7.32 - 7.29 (m, 1 H), 7.25 - 7.20 (m, 1 H), 5.02 (d, *J* = 8.6 Hz, 1 H), 4.78 (br. s., 1 H), 4.38 - 4.31 (m, 1 H), 3.44 (br. s., 2 H), 3.15 (d, *J* = 7.4 Hz, 2 H), 1.96 (br. s., 2 H), 1.83 - 1.64 (m, 4 H), 1.58 - 1.50 (m, 2 H), 1.27 (br. s., 1 H), 0.95 (d, *J* = 6.3 Hz, 6 H). LCMS (ESI+) expected m/z 416.14, found 417.30 (M+H<sup>+</sup>).

**(((1-((3-fluorophenyl)sulfonyl)piperidin-4-yl)oxy)carbonyl)-L-leucine (6j).**



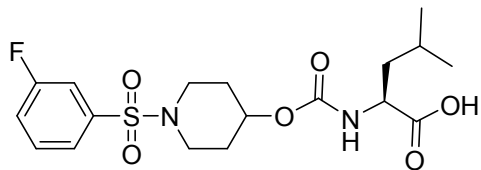

Off white solid, yield (110 mg),  $^1\text{H NMR}$  (400MHz,  $\text{CDCl}_3$ )  $\delta$  = 7.59 - 7.53 (m, 2 H), 7.48 (d,  $J$  = 7.4 Hz, 1 H), 7.32 (d,  $J$  = 7.0 Hz, 1 H), 6.70 (br. s., 1 H), 5.79 (br. s., 1 H), 5.01 (d,  $J$  = 8.2 Hz, 1 H), 4.82 - 4.68 (m, 1 H), 4.32 (br. s., 1 H), 4.14 - 3.98 (m, 1 H), 3.28 (br. s., 2 H), 2.99 (br. s., 2 H), 1.96 (br. s., 2 H), 1.79 (br. s., 2 H), 1.68 (d,  $J$  = 9.4 Hz, 2 H), 1.53 (br. s., 2 H), 1.26 (br. s., 1 H), 0.94 (d,  $J$  = 5.1 Hz, 6 H). LCMS (ESI+) expected  $m/z$  416.14, found 417.30 ( $\text{M}+\text{H}^+$ ).

**(((1-((2,4-dinitrophenyl)sulfonyl)piperidin-4-yl)oxy)carbonyl)-L-leucine (6k).**

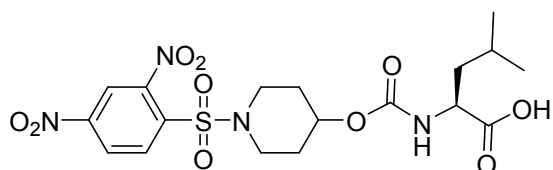

Off yellow solid, yield (90 mg),  $^1\text{H NMR}$  (400MHz,  $\text{CDCl}_3$ )  $\delta$  = 11.08 - 10.99 (m, 1 H), 9.09 (d,  $J$  = 2.3 Hz, 1 H), 8.53 - 8.39 (m, 1 H), 7.35 (d,  $J$  = 9.4 Hz, 1 H), 4.11(m, 2 H), 3.94 (m, 2 H), 3.83 - 3.75 (m, 2 H), 3.71 - 3.58 (m, 4 H), 2.18 (m, 3 H), 1.07 - 0.93 (m, 6 H). LCMS (ESI+) expected  $m/z$  488.12, found 489.30 ( $\text{M}+\text{H}^+$ ).

**(((1-((5-chloro-2-methoxyphenyl)sulfonyl)piperidin-4-yl)oxy)carbonyl)-L-leucine (6l).**

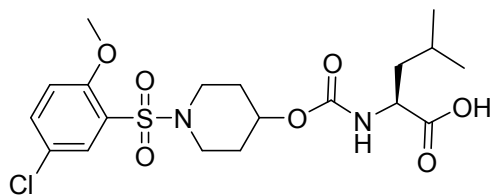

Off white solid, yield (100 mg),  $^1\text{H NMR}$  (400MHz,  $\text{CDCl}_3$ )  $\delta$  = 7.88 (s, 1 H), 7.47 (dd,  $J$  = 2.3, 8.6 Hz, 1 H), 6.97 (d,  $J$  = 9.0 Hz, 1 H), 5.02 (d,  $J$  = 8.6 Hz, 1 H), 4.78 (br. s., 1 H), 4.36 (d,  $J$  = 3.1 Hz, 1 H), 3.92 (s, 3 H), 3.51 (d,  $J$  = 6.3 Hz, 2 H), 3.16 (d,  $J$  = 9.4 Hz, 2 H), 1.94 (br. s., 2 H), 1.79

- 1.66 (m, 4 H), 1.55 (t,  $J = 8.6$  Hz, 2 H), 0.96 (d,  $J = 5.9$  Hz, 6 H). LCMS (ESI+) expected  $m/z$  462.12, found 463.30 ( $M+H^+$ ).

**(((1-(mesitylsulfonyl)piperidin-4-yl)oxy)carbonyl)-L-leucine (6m).**

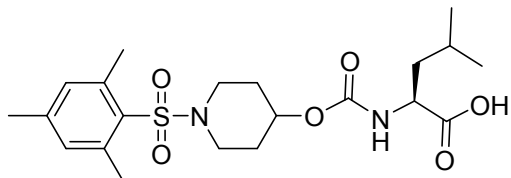

Off white solid, yield (130 mg),  $^1\text{H NMR}$  (400MHz,  $\text{CDCl}_3$ )  $\delta = 6.95$  (s, 2 H), 5.15 (d,  $J = 8.2$  Hz, 1 H), 4.82 (br. s., 1 H), 4.35 (br. s., 1 H), 3.36 (br. s., 2 H), 3.11 (br. s., 2 H), 2.61 (s, 6 H), 2.30 (s, 3 H), 2.18 (s, 2 H), 1.88 (d,  $J = 3.5$  Hz, 2 H), 1.82 - 1.69 (m, 3 H), 1.62 - 1.52 (m, 2 H), 0.96 (d,  $J = 5.9$  Hz, 6 H). LCMS (ESI+) expected  $m/z$  440.20, found 441.40 ( $M+H^+$ ).
